# Supplementary material for: Immunogenomic, single-cell and spatial dissection of CD8+T cell exhaustion reveals critical determinants of cancer immunotherapy
Source: bioRxiv or medRxiv preprint supplement (doi:10.1101/2021.11.22.468617), 2021-11-22
Supplement: Supplementary file [file media-2.pdf]

**Supplementary BOX I.** The annotation of CD4<sup>+</sup>/CD8<sup>+</sup>T cell sub-populations based on scRNASeq-data analyses.

**Abbreviations:** Overall expression representation of; HI, high-level; MED, medium-level; LO, low-level; +, minimal-level; MIN, minimal-to-negligible level; and NULL, negligible-to-zero level.

### SKCM-CD8<sup>+</sup>T cells

**Cluster 0 Pre-T<sub>EM</sub>-like (Pre effector-memory like)** IFNG<sup>MED</sup>, GZMA<sup>HI</sup>, PRFI<sup>HI</sup>, KLRG1<sup>+</sup>, EOMES<sup>+</sup>, TBX21<sup>+</sup>, CCR7<sup>NULL</sup>, SELL<sup>MIN</sup>, CD44<sup>MED</sup>

**Cluster 1 T<sub>EFF</sub>-like (Effector-like)** TBX21<sup>+</sup>, TNF<sup>NULL</sup>, IFNG<sup>MED</sup>, PRFI<sup>HI</sup>, GZMA<sup>HI</sup>, GZMB<sup>HI</sup>, GZMK<sup>MED</sup>, CCL5<sup>HI</sup>, CCL3<sup>LO</sup>, CCL4<sup>MED</sup>, BTLA<sup>+</sup>, CTLA4<sup>MED</sup>, PDCDI<sup>MED</sup>, ICOS<sup>LO</sup>, LAG3<sup>MED</sup>

**Cluster 2 T<sub>RM</sub> (Resting-memory)** IFNG<sup>+</sup>, GZMB<sup>MIN</sup>, GZMA<sup>MIN</sup>, PRFI<sup>HI</sup>, KLRG1<sup>LO</sup>, TOX<sup>MED</sup>, EOMES<sup>LO</sup>, TBX21<sup>MIN</sup>, TNF<sup>NULL</sup>, CCR7<sup>MIN</sup>, SELL<sup>MIN</sup>, CD44<sup>MED</sup>

**Cluster 3 Pre-T<sub>EM</sub> (Pre effector-memory)** IFNG<sup>MED</sup>, GZMA<sup>HI</sup>, PRFI<sup>HI</sup>, KLRG1<sup>LO</sup>, EOMES<sup>MED</sup>, TBX21<sup>NULL</sup>, TNF<sup>NULL</sup>, CCR7<sup>NULL</sup>, SELL<sup>MIN</sup>, CD44<sup>MED</sup>

**Cluster 4 T<sub>CM</sub> (Central-memory)** CCR7<sup>MED</sup>, SELL<sup>HI</sup>, IL7R<sup>HI</sup>, CD27<sup>HI</sup>, TBX21<sup>NULL</sup>, EOMES<sup>LO</sup>, PRFI<sup>LO</sup>, GZMA/B<sup>MIN</sup>

**Cluster 5 T<sub>EMRA</sub> (Effector memory re-expressing CD45RA)** CCR7<sup>NULL</sup>, CD27<sup>LO</sup>, GZMA/B<sup>HI</sup>, GZMK<sup>MED</sup>, PRFI<sup>MED</sup>, IFNG<sup>+</sup>, TNF<sup>+</sup>, TOX<sup>LO</sup>, PDCDI<sup>MIN</sup>, CTLA4<sup>MIN</sup>

**Cluster 6 T<sub>EFF</sub> (Effector)** TBX21<sup>+</sup>, TNF<sup>+</sup>, IFNG<sup>HI</sup>, PRFI<sup>HI</sup>, GZMA<sup>HI</sup>, GZMB<sup>HI</sup>, GZMK<sup>HI</sup>, CCL5<sup>HI</sup>, CCL3<sup>HI</sup>, CCL4<sup>HI</sup>, BTLA<sup>+</sup>, CTLA4<sup>HI</sup>, PDCDI<sup>HI</sup>, ICOS<sup>MED</sup>, LAG3<sup>MED</sup>

**Cluster 7 T<sub>SEFF</sub> (Suppressed-effector)** TBX21<sup>NULL</sup>, TNF<sup>NULL</sup>, IFNG<sup>+</sup>, STAT1<sup>LO</sup>, PRFI<sup>HI</sup>, GZMA<sup>HI</sup>, GZMB<sup>MIN</sup>, GZMK<sup>HI</sup>, CCL5<sup>HI</sup>, CCL3<sup>MED</sup>, CCL4<sup>HI</sup>, BTLA<sup>NULL</sup>, CTLA4<sup>LO</sup>, PDCDI<sup>HI</sup>, ICOS<sup>LO</sup>, LAG3<sup>MED</sup>

**Cluster 8 T<sub>DPE</sub>-like (Double-positive effector-like)** KLRG1<sup>MED</sup>, IL7R<sup>LO</sup>, STAT1<sup>HI</sup>, TBX21<sup>NULL</sup>, TIGIT<sup>MED</sup>, PRFI<sup>MED</sup>, PDCDI<sup>LO</sup>, GZMA<sup>LO</sup>, GZMB<sup>NULL</sup>, GZMK<sup>HI</sup>

**Cluster 9 MAIT-like (Mucosal associated invariant T cells)** CD8A<sup>MIN</sup>, CD8B<sup>NULL</sup>, CD44<sup>HI</sup>, CCR7<sup>NULL</sup>, SELL<sup>MIN</sup>

**Cluster 10 T<sub>EM</sub> (Effector-memory)** IFNG<sup>HI</sup>, GZMB<sup>HI</sup>, GZMA<sup>MED</sup>, PRFI<sup>HI</sup>, KLRG1<sup>LO</sup>, EOMES<sup>+</sup>, TBX21<sup>+</sup>, TNF<sup>+</sup>, CCR7<sup>NULL</sup>, SELL<sup>NULL</sup>, CD44<sup>MED</sup>

**Cluster 11 Pre-T<sub>EFF</sub> (Pre-effector)** TBX21<sup>NULL</sup>, TNF<sup>NULL</sup>, IFNG<sup>MED</sup>, PRFI<sup>MED</sup>, GZMA<sup>HI</sup>, GZMB<sup>NULL</sup>, GZMK<sup>HI</sup>, CCL5<sup>HI</sup>, CCL3<sup>MIN</sup>, CCL4<sup>HI</sup>, BTLA<sup>+</sup>, CTLA4<sup>MIN</sup>, PDCDI<sup>LO</sup>, ICOS<sup>LO</sup>, LAG3<sup>LO</sup>

**Cluster 12 Early-T<sub>EFF</sub> (Early-effector)** TBX21<sup>NULL</sup>, TNF<sup>NULL</sup>, IFNG<sup>MED</sup>, PRFI<sup>HI</sup>, GZMA<sup>LO</sup>, GZMB<sup>MIN</sup>, GZMK<sup>MIN</sup>, CCL5<sup>HI</sup>, CCL3<sup>LO</sup>, CCL4<sup>HI</sup>, BTLA<sup>+</sup>, CTLA4<sup>LO</sup>, PDCDI<sup>MED</sup>, ICOS<sup>LO</sup>, LAG3<sup>MED</sup>

**Cluster 13 T<sub>N</sub> (Naive)** CCR7<sup>MED</sup>, IL7R<sup>HI</sup>, SELL<sup>MED</sup>, CTLA4<sup>NULL</sup>, TOX<sup>NULL</sup>, EOMES<sup>NULL</sup>, GZMA/B/K<sup>NULL</sup>, PRFI<sup>LO</sup>, ICOS<sup>MIN</sup>, IFNG<sup>NULL</sup>, TNF<sup>NULL</sup>

**Cluster 14 T<sub>TIPM</sub> (Tumour-infiltrating peripheral-memory)** SELL<sup>LO</sup>, PRFI<sup>LO</sup>, GZMA<sup>MED</sup>, GZMB<sup>NULL</sup>, GZMK<sup>HI</sup>, IFNG<sup>MIN</sup>, TNF<sup>NULL</sup>, CCR7<sup>MED</sup>, CD27<sup>MED</sup>, TBX21<sup>NULL</sup>

**Cluster 15 T<sub>RDM</sub> (Resident-memory)** ITGAE<sup>HI</sup>, KLRG1<sup>MIN</sup>, CCR7<sup>NULL</sup>, SELL<sup>MIN</sup>, KLF2<sup>NULL</sup>, EOMES<sup>NULL</sup>, TBX21<sup>NULL</sup>

## SKCM-CD4<sup>+</sup>T cells

### Cluster 0 KLRBI<sup>HI</sup>CD4<sup>+</sup>T

**Cluster 1 T<sub>REG</sub> (Regulatory)** FOXP3<sup>HI</sup>, TIGIT<sup>HI</sup>, IKZF2<sup>MED</sup>, CTLA4<sup>HI</sup>, IL2RA<sup>MED</sup>, TNFRSF18<sup>HI</sup>, TNFRSF9<sup>MED</sup>, ENTPD1<sup>MED</sup>, IL10<sup>MED</sup>

**Cluster 2 T<sub>RN</sub> (Resting-Naive)** CXCR4<sup>HI</sup>, CTLA4<sup>NULL</sup>, CXCR3<sup>NULL</sup>, CXCR5<sup>NULL</sup>, CCR5<sup>NULL</sup>, FOXP3<sup>NULL</sup>, GATA3<sup>MIN</sup>, ICOS<sup>NULL</sup>, IKZF2<sup>NULL</sup>, PDCDI<sup>NULL</sup>, STAT1<sup>LO</sup>

**Cluster 3 T<sub>FH</sub> (Follicular-helper)** BATF<sup>HI</sup>, BCL6<sup>MED</sup>, MAF<sup>HI</sup>, PDCDI<sup>HI</sup>, STAT3<sup>MED</sup>, ICOS<sup>HI</sup>, CXCR5<sup>LO</sup>;

**Cluster 4 T<sub>IFNS</sub> (Interferon-stimulated)** STAT1<sup>HI</sup>, STAT3<sup>MED</sup>, STAT4<sup>LO</sup>, STAT6<sup>LO</sup>, PDCDI<sup>NULL</sup>, CTLA4<sup>MIN</sup>, REL<sup>MED</sup>

**Cluster 5 T<sub>H2</sub> (type-II polarised)** GATA3<sup>MED</sup>, FOXP3<sup>NULL</sup>, CXCR3<sup>NULL</sup>

### Cluster 6 TIGIT<sup>HI</sup>CD4<sup>+</sup>T

**Cluster 7 T<sub>HI</sub> (Type-I polarised)** CXCR3<sup>HI</sup>, CCR5<sup>LO</sup>, CXCR6<sup>+</sup>, ICOS<sup>LO</sup>, TNF<sup>+</sup>, CTLA4<sup>LO</sup>, CD28<sup>MED</sup>, TOX<sup>MIN</sup>, STAT1<sup>MED</sup>, PDCDI<sup>LO</sup>

**Cluster 8 T<sub>N</sub> (Naive)** CXCR4<sup>LO</sup>, CD28<sup>LO</sup>, CCR5<sup>NULL</sup>, CXCR3<sup>NULL</sup>, FOXP3<sup>NULL</sup>, GATA3<sup>MIN</sup>, ICOS<sup>MIN</sup>, PDCDI<sup>NULL</sup>, STAT1<sup>LO</sup>, TIGIT<sup>MIN</sup>, TNF<sup>NULL</sup>

### Cluster 9 ICOS<sup>HI</sup>CD4<sup>+</sup>T

**Cluster 10 T<sub>H22-like</sub> (Type-22 polarised-like)** CCR4<sup>HI</sup>, AHR<sup>MED</sup>, STAT1<sup>LO</sup>, CTLA4<sup>MIN</sup>, PDCDI<sup>NULL</sup>, ICOS<sup>MED</sup>

**Cluster 11 T<sub>DFF</sub> (Dysfunctional-precursor)** PDCDI<sup>MED</sup>, CCR6<sup>MED</sup>, STAT1<sup>NULL</sup>, IL21R<sup>LO</sup>, TNF<sup>NULL</sup>, ICOS<sup>NULL</sup>,

**Cluster 12 T<sub>IN</sub> (Inflamed-naive)** CXCR4<sup>MED</sup>, CD28<sup>LO</sup>, CCR5<sup>LO</sup>, CXCR3<sup>MIN</sup>, FOXP3<sup>NULL</sup>, GATA3<sup>LO</sup>, ICOS<sup>MED</sup>, PDCDI<sup>MIN</sup>, STAT1<sup>MED</sup>, TIGIT<sup>MED</sup>, TOX<sup>MED</sup>, TNF<sup>NULL</sup>

## GBM-CD8<sup>+</sup>T cells

**Cluster 0 T<sub>DFF</sub> (Dysfunctional-precursor)** CD8A<sup>MED</sup>, CD8B<sup>LO</sup>, IL7R<sup>MED</sup>, KLRG1<sup>LO</sup>, IFNG<sup>NEG</sup>, GZMB<sup>NULL</sup>, GZMA<sup>NULL</sup>, PRFI<sup>LO</sup>, TNF<sup>LO</sup>, CD44<sup>MED</sup>

**Cluster 1 CD27<sup>HI</sup>CD8<sup>+</sup>T<sub>DF</sub> (Dysfunctional)** IL7R<sup>LO</sup>, CD27<sup>HI</sup>, TOX<sup>+</sup>, TIGIT<sup>+</sup>, PDCDI<sup>LO</sup>, GZMA<sup>HI</sup>, GZMB<sup>NEG</sup>, GZMK<sup>HI</sup>, PRFI<sup>LO</sup>, ICOS<sup>LO</sup>, IFNG<sup>NULL</sup>, TNF<sup>LO</sup>

**Cluster 2 Pre-T<sub>EFF</sub> (Pre-effector)** TNF<sup>NEG</sup>, CD27<sup>NULL</sup>, ICOS<sup>NEG</sup>, IFNG<sup>LO</sup>, STAT1<sup>LO</sup>, PRFI<sup>MED</sup>, GZMA<sup>MED</sup>, GZMB<sup>HI</sup>, CCL4<sup>MED</sup>, TOX<sup>NULL</sup>, PDCDI<sup>LO</sup>

**Cluster 3 TOX<sup>HI</sup>CD8<sup>+</sup>T<sub>INV</sub> (Invariant)** CD8A<sup>LO</sup>, CD8B<sup>LO</sup>, TOX<sup>HI</sup>, CCL4<sup>HI</sup>, CD27<sup>LO</sup>, CD44<sup>HI</sup>, IFNG<sup>+</sup>, GZMB<sup>NEG</sup>, GZMA<sup>HI</sup>, PRFI<sup>MED</sup>, KLRG1<sup>MED</sup>, IL7R<sup>NULL</sup>

**Cluster 4 T<sub>RDF</sub> (Resident-dysfunctional)** IL7R<sup>HI</sup>, ITGAE<sup>MED</sup>, KLRG1<sup>NULL</sup>, CD27<sup>MED</sup>, GZMA<sup>MED</sup>, PRFI<sup>MED</sup>, ICOS<sup>LO</sup>, IFNG<sup>NEG</sup>, STAT1<sup>NULL</sup>, TNF<sup>NULL</sup>, TOX<sup>NEG</sup>, PDCDI<sup>LO</sup>, TIGIT<sup>LO</sup>

## GBM-CD4<sup>+</sup>T cells

**Cluster 0 T<sub>N</sub> (Naive)** IL7R<sup>HI</sup>, SELL<sup>HI</sup>, CD28<sup>LO</sup>, CTLA4<sup>NEG</sup>, GZMA<sup>NULL</sup>, PRFI<sup>LO</sup>, ICOS<sup>LO</sup>, PDCDI<sup>LO</sup>, TIGIT<sup>LO</sup>, TNF<sup>NULL</sup>

**Cluster 1 T<sub>IF</sub> (Inflammatory)** CCL4<sup>HI</sup>, TNF<sup>HI</sup>, CD28<sup>LO</sup>, CTLA4<sup>NEG</sup>, GZMA<sup>LO</sup>, PRFI<sup>HI</sup>, ICOS<sup>NULL</sup>, PDCDI<sup>LO</sup>, TIGIT<sup>LO</sup>, TOX<sup>MED</sup>

**Cluster 2 ICOS<sup>MED</sup>CD4<sup>+</sup>T<sub>DF</sub> (Dysfunctional)** ICOS<sup>MED</sup>, CTLA4<sup>NEG</sup>, TOX<sup>LO</sup>, CD28<sup>LO</sup>, PDCDI<sup>LO</sup>, GZMA<sup>HI</sup>, PRFI<sup>NEG</sup>

**Cluster 3 T<sub>DF</sub> (Dysfunctional)** CTLA4<sup>NEG</sup>, TOX<sup>NEG</sup>, CD28<sup>LO</sup>, ICOS<sup>NULL</sup>, PDCDI<sup>LO</sup>, GZMA<sup>NULL</sup>, PRFI<sup>NULL</sup>

**Cluster 4 ICOS<sup>HI</sup>T<sub>REG</sub>-like (Regulatory-like)** ICOS<sup>HI</sup>, CTLA4<sup>HI</sup>, IL2RB<sup>HI</sup>, TIGIT<sup>LO</sup>, SELL<sup>MED</sup>, TNF<sup>NEG</sup>, PRFI<sup>LO</sup>, GZMA<sup>NULL</sup>, PDCDI<sup>NEG</sup>

**Cluster 5 T<sub>PC</sub> (Precursor)** IL7R<sup>HI</sup>, IL2RB<sup>MED</sup>, CTLA4<sup>NULL</sup>, TOX<sup>LO</sup>, CD28<sup>MED</sup>, ICOS<sup>NEG</sup>, PDCDI<sup>LO</sup>, GZMA<sup>HI</sup>, PRFI<sup>NULL</sup>
